# Supplementary material for: Brain Dissection Photogrammetry for Studying Human White Matter Connections: a Unique Resource for Integrating Ex-vivo and In-vivo Multimodal Datasets
Source: Research Square preprint supplement (doi:10.21203/rs.3.rs-6480729/v1), 2025-04-23
Supplement: Supplementary file 1 [file 89708afd40740cf87be4f254.docx]

**Supplementary Table 1.** Summary of the dissection features for each specimen currently included in BraDiPho.

| **Specimen** | **Hemisphere** | **Epochs** | **Latero-medial dissection** | **Dorsal association fibers dissection** | **Ventral association fibers dissection** | **Basal association fibers dissection** |
| --- | --- | --- | --- | --- | --- | --- |
| spc-01 | Right | 11 | ✔ | ✔ |  |  |
| spc-02 | Left | 10 | ✔ | ✔ |  |  |
| spc-04 | Right | 10 | ✔ | ✔ |  |  |
| spc-10 | Left | 12 | ✔ | ✔ |  |  |
| spc-16 | Right | 13 | ✔ |  | ✔ |  |
| spc-17 | Left | 7 |  |  | ✔ | ✔ |
| spc-18 | Right | 8 |  |  | ✔ | ✔ |
| spc-19 | Left | 12 | ✔ |  | ✔ |  |
