# Supplementary material for: Brain Dissection Photogrammetry for Studying Human White Matter Connections: a Unique Resource for Integrating Ex-vivo and In-vivo Multimodal Datasets
Source: Research Square preprint supplement (doi:10.21203/rs.3.rs-6480729/v1), 2025-04-23
Supplement: Supplementary file 2 [file f8d559b6acdac874b841ac9b.xlsx]

## Sheet: Gyral Annotations
Abbreviation	Full Name	Matplolib color names	R	G	B	Hex
AG	Angular Gyrus	darkgreen	28	111	19	1C6F13
FrOrb	Frontal Orbital Gyrus	yellow	255	255	0	FFFF00
FuG	Fusiform Gyrus	mediumblue	0	0	205	0000CD
IFG	Inferior Frontal Gyrus	gold	255	215	0	FFD700
IOG	Inferior Occipital Gyrus	pink	255	192	203	FFC0CB
ITG	Inferior Temporal Gyrus	lightskyblue	153	204	255	99CCFF
LG	Lingual Gyrus	lightblue	173	216	230	ADD8E6
MFG	Middle Frontal Gyrus	darkorange	255	140	0	FF8C00
MOG	Middle Occipital Gyrus	hotpink	255	105	180	FF69B4
MTG	Middle Temporal Gyrus	deepskyblue	0	153	255	0099FF
PHG	Parahippocampal Gyrus	cornflowerblue	100	149	237	6495ED
PoCG	Postcentral Gyrus	lime	0	255	0	00FF00
PrCG	Precentral Gyrus	red	255	0	0	FF0000
SFG	Superior Frontal Gyrus	darkred	153	0	0	990000
SMG	Supramarginal Gyrus	yellowgreen	154	205	50	9ACD32
SOG	Superior Occipital Gyrus	darkorchid	153	51	255	9933FF
SPG	Superior Parietal Gyrus	seagreen	28	73	32	1C4920
STG	Superior Temporal Gyrus	royalblue	65	105	225	4169E1
T-pole	Temporal Pole	cyan	0	255	255	00FFFF

## Sheet: Brodmann
Labels	left side	right side	R	G	B	Hex
BA1_3	1001	2001	245	249	233	#F5F9E9
BA2	1002	2002	226	237	189	#E2EDBD
BA4	1003	2003	213	232	244	#D5E8F4
BA5	1004	2004	207	225	145	#CFE191
BA6	1005	2005	171	209	233	#ABD1E9
BA7	1006	2006	188	214	101	#BCD665
BA8	1007	2007	129	186	222	#81BADE
BA9	1008	2008	108	175	217	#6CAFD9
BA10	1009	2009	66	152	206	#4298CE
BA11	1010	2010	45	141	201	#2D8DC9
BA13	1011	2011	163	57	60	#A3393C
BA16	1012	2012	232	81	86	#E85156
BA17	1013	2013	255	239	240	#FFEFF0
BA18	1014	2014	255	194	196	#FFC2C4
BA19	1015	2015	255	164	167	#FFA4A7
BA20	1016	2016	106	76	166	#6A4CA6
BA21	1017	2017	133	108	166	#856CA6
BA22	1018	2018	160	141	186	#A08DBA
BA23	1019	2019	209	166	48	#D1A630
BA24	1020	2020	255	235	183	#FFEBB7
BA25	1021	2021	255	200	87	#FFC857
BA26_29_30	1022	2022	140	111	32	#8C6F20
BA27	1023	2023	68	49	94	#44315E
BA28	1024	2024	49	35	67	#312343
BA31	1025	2025	255	206	75	#FFCE4B
BA32	1026	2026	255	221	129	#FFDD81
BA33	1027	2027	255	250	237	#FFFAED
BA34	1028	2028	100	100	192	#6464C0
BA35_36	1029	2029	29	21	41	#1D1529
BA37	1030	2030	187	173	205	#BBADCD
BA38	1031	2031	87	63	121	#573F79
BA39	1032	2032	169	202	57	#A9CA39
BA40	1033	2033	151	191	13	#97BF0D
BA41_42_52	1034	2034	241	238	245	#F1EEF5
BA43	1035	2035	124	157	11	#7C9D0B
BA44	1036	2036	23	119	179	#1777B3
BA45	1037	2037	19	95	143	#135F8F
BA46	1038	2038	14	71	107	#0E476B
BA47	1039	2039	10	48	72	#0A3048

## Sheet: Campbell
Labels	left side	right side	R	G	B	Hex
prefrontal	1001	2001	255	195	18	#FFC312
frontal	1002	2002	247	159	31	#F79F1F
inter_precentral	1003	2003	238	90	36	#EE5A24
precentral	1004	2004	234	32	39	#EA2027
postcentral	1005	2005	196	229	56	#C4E538
inter_postcentral	1006	2006	0	148	50	#009432
parietal	1007	2007	0	98	102	#006266
visuopsychic	1008	2008	18	203	196	#12CBC4
visuosensory	1009	2009	18	137	167	#1289A7
temporal	1010	2010	6	82	221	#0652DD
audiopsychic	1011	2011	27	20	100	#1B1464
audiosensory	1012	2012	88	86	171	#5856AB
olfactory	1013	2013	217	128	250	#D980FA
limbicA	1014	2014	153	128	250	#9980FA
limbicB	1015	2015	87	88	187	#5758BB
limbicC	1016	2016	237	76	103	#ED4C67
insula	1017	2017	181	52	113	#B53471

## Sheet: EconomoCT
Labels	left side	right side	R	G	B	Hex
CT1	1001	2001	252	92	101	#FC5C65
CT1_2_fro_inf	1002	2002	253	151	68	#FD9744
CT1_2_mof	1003	2003	253	152	68	#FD9844
CT1_2_pref_ins_postc	1004	2004	253	150	69	#FD9645
CT1_2_temp	1005	2005	253	150	67	#FD9643
CT2_fro	1006	2006	254	211	48	#FED330
CT2_par	1007	2007	254	212	48	#FED430
CT3_fro	1008	2008	38	222	129	#26DE81
CT3_par	1009	2009	38	223	129	#26DF81
CT4_occ	1010	2010	43	203	186	#2BCBBA
CT4_dmpf	1011	2011	43	204	186	#2BCCBA
CT5_cen	1012	2012	69	170	242	#45AAF2
CT5_ins	1013	2013	69	171	242	#45ABF2
CT5_med	1014	2014	69	170	243	#45AAF3
CT5_occ	1015	2015	69	170	244	#45AAF4

## Sheet: Flechsig
Labels	left side	right side	R	G	B	Hex
F2	1001	2001	217	248	252	#D9F8FC
F3	1002	2002	237	231	245	#EDE7F5
F4	1003	2003	251	231	236	#FBE7EC
F5	1004	2004	125	233	246	#7DE9F6
F6	1005	2005	203	185	225	#CBB9E1
F7	1006	2006	231	208	217	#E7D0D9
F8	1007	2007	255	240	210	#FFF0D2
F9	1008	2008	69	224	242	#45E0F2
F10	1009	2009	198	249	115	#C6F973
F10x	1010	2010	255	177	11	#FFB10B
F11	1011	2011	248	162	179	#F8A2B3
F12	1012	2012	24	101	110	#18656E
F13	1013	2013	170	246	46	#AAF62E
F14	1014	2014	130	0	26	#82001A
F15	1015	2015	255	198	77	#FFC64D
F16	1016	2016	24	0	54	#180036
F17	1017	2017	83	23	156	#53179C
F18	1018	2018	217	251	162	#D9FBA2
F19	1019	2019	236	253	208	#ECFDD0
F20	1020	2020	51	176	160	#33B0A0
F21	1021	2021	245	115	141	#F5738D
F22	1022	2022	169	139	205	#A98BCD
F23	1023	2023	255	219	144	#FFDB90
F24	1024	2024	243	92	122	#F35C7A
F25	1025	2025	240	46	84	#F02E54
F26	1026	2026	151	115	196	#9773C4
F27	1027	2027	125	201	0	#7DC900
F28	1028	2028	42	67	0	#2A4300
F29	1029	2029	49	0	107	#31006B
F30	1030	2030	186	129	11	#BA810B
F31	1031	2031	83	134	0	#538600
F32	1032	2032	36	0	81	#240051
F33	1033	2033	47	201	220	#2FC9DC
F34	1034	2034	108	0	22	#6C0016
F35	1035	2035	194	0	39	#C20027
F36	1036	2036	65	0	13	#41000D
F37	1037	2037	117	69	176	#7545B0
F38	1038	2038	237	0	47	#ED002F
F39	1039	2039	12	0	27	#0C001B
F40	1040	2040	116	81	5	#745105
F41	1041	2041	33	141	154	#218D9A
F42	1042	2042	60	0	134	#3C0086
F43	1043	2043	44	0	9	#2C0009
F44	1044	2044	152	246	46	#98F62E
F45	1045	2045	173	0	35	#AD0023
F2b	1046	2046	180	242	249	#B4F2F9

## Sheet: Kleist
Labels	left side	right side	R	G	B	Hex
K1_3a_3b	1001	2001	0	102	0	#006600
K2	1002	2002	29	121	16	#1D7910
K4	1003	2003	25	0	153	#190099
K5	1004	2004	128	128	128	#808080
K6aa	1005	2005	39	20	161	#2714A1
K6ab_1	1006	2006	53	40	168	#3528A8
K6ab_2	1007	2007	66	59	176	#423BB0
K7	1008	2008	57	140	32	#398C20
K8_1	1009	2009	80	78	184	#504EB8
K8_2	1010	2010	94	98	192	#5E62C0
K9	1011	2011	108	118	200	#6C76C8
K10	1012	2012	122	137	208	#7A89D0
K11_12	1013	2013	135	156	216	#879CD8
K13	1014	2014	148	148	148	#949494
K16	1015	2015	168	168	168	#A8A8A8
K17_1	1016	2016	179	0	0	#B30000
K17_2	1017	2017	188	29	32	#BC1D20
K17_3	1018	2018	197	57	63	#C5393F
K18_1	1019	2019	207	86	96	#CF5660
K18_2	1020	2020	217	115	128	#D97380
K18_3	1021	2021	226	143	159	#E28F9F
K19_1	1022	2022	236	172	191	#ECACBF
K19_2	1023	2023	245	201	223	#F5C9DF
K19_3	1024	2024	255	229	255	#FFE5FF
K20	1025	2025	102	0	128	#660080
K21	1026	2026	118	26	144	#761A90
K22a_1	1027	2027	134	51	159	#86339F
K22a_2	1028	2028	150	77	175	#964DAF
K22b_1	1029	2029	166	102	191	#A666BF
K22b_2	1030	2030	181	128	207	#B580CF
K23_24_26_29_30_31_32_33	1031	2031	250	200	90	#FAC85A
K25	1032	2032	189	189	189	#BDBDBD
K27	1033	2033	209	209	209	#D1D1D1
K28_34	1034	2034	197	153	223	#C599DF
K35_36	1035	2035	150	90	180	#965AB4
K37	1036	2036	213	178	239	#D5B2EF
K38	1037	2037	230	230	230	#E6E6E6
K39_1	1038	2038	86	159	48	#569F30
K39_40	1039	2039	115	179	64	#73B340
K40_1	1040	2040	143	198	80	#8FC650
K40_2	1041	2041	172	217	96	#ACD960
K40_3	1042	2042	200	236	112	#C8EC70
K41_42_52	1043	2043	230	204	255	#E6CCFF
K43	1044	2044	229	255	127	#E5FF7F
K44a	1045	2045	149	176	224	#95B0E0
K44b	1046	2046	162	196	231	#A2C4E7
K45	1047	2047	176	216	239	#B0D8EF
K46	1048	2048	190	235	247	#BEEBF7
K47	1049	2049	204	255	255	#CCFFFF

## Sheet: Smith
Labels	left side	right side	R	G	B	Hex
callosA	1001	2001	242	240	247	#F2F0F7
callosB	1002	2002	203	201	226	#CBC9E2
callosC	1003	2003	158	154	200	#9E9AC8
callosD	1004	2004	106	81	163	#6A51A3
froB	1005	2005	255	240	226	#FFF0E2
froC	1006	2006	253	192	135	#FDC087
froD	1007	2007	253	174	107	#FDAE6B
froinf	1008	2008	253	141	60	#FD8D3C
froint	1009	2009	250	123	37	#FA7B25
frointB	1010	2010	241	105	19	#F16913
froorb	1011	2011	217	72	1	#D94801
froprefro	1012	2012	193	62	2	#C13E02
frosup	1013	2013	166	54	3	#A63603
frosupant	1014	2014	127	39	4	#7F2704
insinf	1015	2015	240	240	240	#F0F0F0
inspostc	1016	2016	189	189	189	#BDBDBD
insprec	1017	2017	99	99	99	#636363
occpar	1018	2018	254	229	217	#FEE5D9
occparastr	1019	2019	252	174	145	#FCAE91
occperistr	1020	2020	251	106	74	#FB6A4A
occstr	1021	2021	222	45	38	#DE2D26
occtemp	1022	2022	165	15	21	#A50F15
paradent	1023	2023	247	252	245	#F7FCF5
paraspl	1024	2024	229	245	224	#E5F5E0
parinfA	1025	2025	199	233	192	#C7E9C0
parinfB	1026	2026	161	217	155	#A1D99B
parinfC	1027	2027	139	207	136	#8BCF88
vis-sen-bnd	1028	2028	116	196	118	#74C476
parsupA	1029	2029	65	171	93	#41AB5D
parsupB	1030	2030	35	139	69	#238B45
postcentA	1031	2031	0	109	44	#006D2C
postcentB	1032	2032	0	68	27	#00441B
precentA	1033	2033	255	245	235	#FFF5EB
precentB	1034	2034	253	208	162	#FDD0A2
pyriform	1035	2035	239	243	255	#EFF3FF
tempinf	1036	2036	198	219	239	#C6DBEF
tempmed	1037	2037	158	202	225	#9ECAE1
temppara	1038	2038	107	174	214	#6BAED6
temppole	1039	2039	49	130	189	#3182BD
tempsup	1040	2040	8	81	156	#08519C
froA	1041	2041	254	230	206	#FEE6CE
tempHeschl	1042	2042	33	113	181	#2171B5
vis-aud-bnd	1043	2043	8	69	148	#084594
parolfact	1044	2044	84	39	143	#54278F

## Sheet: Desikan
Labels	left side	right side	R	G	B	Hex
bankssts	1001	2001	25	100	40	#196428
caudalanteriorcingulate	1002	2002	125	100	160	#7D64A0
caudalmiddlefrontal	1003	2003	100	25	0	#641900
corpuscallosum	1004	2004	120	70	50	#784632
cuneus	1005	2005	220	20	100	#DC1464
entorhinal	1006	2006	220	20	10	#DC140A
fusiform	1007	2007	180	220	140	#B4DC8C
inferiorparietal	1008	2008	220	60	220	#DC3CDC
inferiortemporal	1009	2009	180	40	120	#B42878
isthmuscingulate	1010	2010	140	20	140	#8C148C
lateraloccipital	1011	2011	20	30	140	#141E8C
lateralorbitofrontal	1012	2012	35	75	50	#234B32
lingual	1013	2013	225	140	140	#E18C8C
medialorbitofrontal	1014	2014	200	35	75	#C8234B
middletemporal	1015	2015	160	100	50	#A06432
parahippocampal	1016	2016	20	220	60	#14DC3C
paracentral	1017	2017	60	220	60	#3CDC3C
parsopercularis	1018	2018	220	180	140	#DCB48C
parsorbitalis	1019	2019	20	100	50	#146432
parstriangularis	1020	2020	220	60	20	#DC3C14
pericalcarine	1021	2021	120	100	60	#78643C
postcentral	1022	2022	220	20	20	#DC1414
posteriorcingulate	1023	2023	220	180	220	#DCB4DC
precentral	1024	2024	60	20	220	#3C14DC
precuneus	1025	2025	160	140	180	#A08CB4
rostralanteriorcingulate	1026	2026	80	20	140	#50148C
rostralmiddlefrontal	1027	2027	75	50	125	#4B327D
superiorfrontal	1028	2028	20	220	160	#14DCA0
superiorparietal	1029	2029	20	180	140	#14B48C
superiortemporal	1030	2030	140	220	220	#8CDCDC
supramarginal	1031	2031	80	160	20	#50A014
frontalpole	1032	2032	100	0	100	#640064
temporalpole	1033	2033	70	70	70	#464646
transversetemporal	1034	2034	150	150	200	#9696C8
insula	1035	2035	255	192	32	#FFC020

## Sheet: Destrieux
Labels	left side	right side	R	G	B	Hex
Unknown	11100	12100	0	0	0	#000000
G_and_S_frontomargin	11101	12101	23	220	60	#17DC3C
G_and_S_occipital_inf	11102	12102	23	60	180	#173CB4
G_and_S_paracentral	11103	12103	63	100	60	#3F643C
G_and_S_subcentral	11104	12104	63	20	220	#3F14DC
G_and_S_transv_frontopol	11105	12105	13	0	250	#0D00FA
G_and_S_cingul-Ant	11106	12106	26	60	0	#1A3C00
G_and_S_cingul-Mid-Ant	11107	12107	26	60	75	#1A3C4B
G_and_S_cingul-Mid-Post	11108	12108	26	60	150	#1A3C96
G_cingul-Post-dorsal	11109	12109	25	60	250	#193CFA
G_cingul-Post-ventral	11110	12110	60	25	25	#3C1919
G_cuneus	11111	12111	180	20	20	#B41414
G_front_inf-Opercular	11112	12112	220	20	100	#DC1464
G_front_inf-Orbital	11113	12113	140	60	60	#8C3C3C
G_front_inf-Triangul	11114	12114	180	220	140	#B4DC8C
G_front_middle	11115	12115	140	100	180	#8C64B4
G_front_sup	11116	12116	180	20	140	#B4148C
G_Ins_lg_and_S_cent_ins	11117	12117	23	10	10	#170A0A
G_insular_short	11118	12118	225	140	140	#E18C8C
G_occipital_middle	11119	12119	180	60	180	#B43CB4
G_occipital_sup	11120	12120	20	220	60	#14DC3C
G_oc-temp_lat-fusifor	11121	12121	60	20	140	#3C148C
G_oc-temp_med-Lingual	11122	12122	220	180	140	#DCB48C
G_oc-temp_med-Parahip	11123	12123	65	100	20	#416414
G_orbital	11124	12124	220	60	20	#DC3C14
G_pariet_inf-Angular	11125	12125	20	60	220	#143CDC
G_pariet_inf-Supramar	11126	12126	100	100	60	#64643C
G_parietal_sup	11127	12127	220	180	220	#DCB4DC
G_postcentral	11128	12128	20	180	140	#14B48C
G_precentral	11129	12129	60	140	180	#3C8CB4
G_precuneus	11130	12130	25	20	140	#19148C
G_rectus	11131	12131	20	60	100	#143C64
G_subcallosal	11132	12132	60	220	20	#3CDC14
G_temp_sup-G_T_transv	11133	12133	60	60	220	#3C3CDC
G_temp_sup-Lateral	11134	12134	220	60	220	#DC3CDC
G_temp_sup-Plan_polar	11135	12135	65	220	60	#41DC3C
G_temp_sup-Plan_tempo	11136	12136	25	140	20	#198C14
G_temporal_inf	11137	12137	220	220	100	#DCDC64
G_temporal_middle	11138	12138	180	60	60	#B43C3C
Lat_Fis-ant-Horizont	11139	12139	61	20	220	#3D14DC
Lat_Fis-ant-Vertical	11140	12140	61	20	60	#3D143C
Lat_Fis-post	11141	12141	61	60	100	#3D3C64
Pole_occipital	11143	12143	140	20	60	#8C143C
Pole_temporal	11144	12144	220	180	20	#DCB414
S_calcarine	11145	12145	63	180	180	#3FB4B4
S_central	11146	12146	221	20	10	#DD140A
S_cingul-Marginalis	11147	12147	221	20	100	#DD1464
S_circular_insula_ant	11148	12148	221	60	140	#DD3C8C
S_circular_insula_inf	11149	12149	221	20	220	#DD14DC
S_circular_insula_sup	11150	12150	61	220	220	#3DDCDC
S_collat_transv_ant	11151	12151	100	200	200	#64C8C8
S_collat_transv_post	11152	12152	10	200	200	#0AC8C8
S_front_inf	11153	12153	221	220	20	#DDDC14
S_front_middle	11154	12154	141	20	100	#8D1464
S_front_sup	11155	12155	61	220	100	#3DDC64
S_interm_prim-Jensen	11156	12156	141	60	20	#8D3C14
S_intrapariet_and_P_trans	11157	12157	143	20	220	#8F14DC
S_oc_middle_and_Lunatus	11158	12158	101	60	220	#653CDC
S_oc_sup_and_transversal	11159	12159	21	20	140	#15148C
S_occipital_ant	11160	12160	61	20	180	#3D14B4
S_oc-temp_lat	11161	12161	221	140	20	#DD8C14
S_oc-temp_med_and_Lingual	11162	12162	141	100	220	#8D64DC
S_orbital_lateral	11163	12163	221	100	20	#DD6414
S_orbital_med-olfact	11164	12164	181	200	20	#B5C814
S_orbital-H_Shaped	11165	12165	101	20	20	#651414
S_parieto_occipital	11166	12166	101	100	180	#6564B4
S_pericallosal	11167	12167	181	220	20	#B5DC14
S_postcentral	11168	12168	21	140	200	#158CC8
S_precentral-inf-part	11169	12169	21	20	240	#1514F0
S_precentral-sup-part	11170	12170	21	20	200	#1514C8
S_suborbital	11171	12171	21	20	60	#15143C
S_subparietal	11172	12172	101	60	60	#653C3C
S_temporal_inf	11173	12173	21	180	180	#15B4B4
S_temporal_sup	11174	12174	223	220	60	#DFDC3C
S_temporal_transverse	11175	12175	221	60	60	#DD3C3C

## Sheet: Brainnetome
Labels	left side	right side	R	G	B	Hex
A8m	1	2	0	0	255	#0000FF
A8dl	3	4	0	246	255	#00F6FF
A9l	5	6	255	220	123	#FFDC7B
A6dl	7	8	0	106	9	#006A09
A6m	9	10	62	0	106	#3E006A
A9m	11	12	141	255	158	#8DFF9E
A10m	13	14	79	123	141	#4F7B8D
A9/46d	15	16	255	0	106	#FF006A
IFJ	17	18	123	88	246	#7B58F6
A46	19	20	123	106	0	#7B6A00
A9/46v	21	22	141	106	176	#8D6AB0
A8vl	23	24	255	158	176	#FF9EB0
A6vl	25	26	62	193	255	#3EC1FF
A10l	27	28	167	9	167	#A709A7
A44d	29	30	0	185	141	#00B98D
IFS	31	32	255	106	79	#FF6A4F
A45c	33	34	70	0	0	#460000
A45r	35	36	202	149	106	#CA956A
A44op	37	38	220	255	123	#DCFF7B
A44v	39	40	158	167	0	#9EA700
A14m	41	42	176	149	167	#B095A7
A12/47o	43	44	0	255	114	#00FF72
A11l	45	46	132	0	229	#8400E5
A11m	47	48	255	255	202	#FFFFCA
A13	49	50	176	255	211	#B0FFD3
A12/47l	51	52	88	53	0	#583500
A4hf	53	54	149	167	229	#95A7E5
A6cdl	55	56	35	123	97	#237B61
A4ul	57	58	176	0	62	#B0003E
A4t	59	60	255	62	229	#FF3EE5
A4tl	61	62	149	255	62	#95FF3E
A6cvl	63	64	0	255	202	#00FFCA
A1/2/3ll	65	66	255	0	62	#FF003E
A4ll	67	68	0	62	255	#003EFF
A38m	69	70	202	88	255	#CA58FF
A41/42	71	72	106	44	106	#6A2C6A
TE1.0/TE1.2	73	74	132	70	185	#8446B9
A22c	75	76	149	149	255	#9595FF
A38l	77	78	0	106	255	#006AFF
A22r	79	80	176	167	79	#B0A74F
A21c	81	82	0	0	70	#000046
A21r	83	84	88	141	0	#588D00
A37dl	85	86	26	211	18	#1AD312
aSTS	87	88	88	88	132	#585884
A20iv	89	90	0	62	0	#003E00
A37elv	91	92	114	0	0	#720000
A20r	93	94	167	211	9	#A7D309
A20il	95	96	26	141	79	#1A8D4F
A37vl	97	98	193	0	132	#C10084
A20cl	99	100	106	220	202	#6ADCCA
A20cv	101	102	149	97	44	#95612C
A20rv	103	104	0	26	141	#001A8D
A37mv	105	106	255	176	9	#FFB009
A37lv	107	108	123	237	97	#7BED61
A35/36r	109	110	220	132	193	#DC84C1
A35/36c	111	112	211	193	141	#D3C18D
TL	113	114	79	97	176	#4F61B0
A28/34	115	116	193	79	97	#C14F61
TI	117	118	220	193	53	#DCC135
TH	119	120	220	97	229	#DC61E5
rpSTS	121	122	0	141	185	#008DB9
cpSTS	123	124	114	106	229	#726AE5
A7r	125	126	70	149	229	#4695E5
A7c	127	128	44	9	18	#2C0912
A5l	129	130	255	193	132	#FFC184
A7pc	131	132	53	220	255	#35DCFF
A7ip	133	134	141	106	141	#8D6A8D
A39c	135	136	35	0	202	#2300CA
A39rd	137	138	123	53	0	#7B3500
A40rd	139	140	18	79	114	#124F72
A40c	141	142	246	158	255	#F69EFF
A39rv	143	144	106	62	53	#6A3E35
A40rv	145	146	220	62	185	#DC3EB9
A7m	147	148	62	44	79	#3E2C4F
A5m	149	150	185	149	202	#B995CA
dmPOS	151	152	176	255	246	#B0FFF6
A31	153	154	167	202	70	#A7CA46
A1/2/3ulhf	155	156	88	53	185	#5835B9
A1/2/3tonIa	157	158	97	114	0	#617200
A2	159	160	185	0	97	#B90061
A1/2/3tru	161	162	255	246	0	#FFF600
G	163	164	220	106	35	#DC6A23
vIa	165	166	193	255	88	#C1FF58
dIa	167	168	185	70	132	#B94684
vId/vIg	169	170	176	106	202	#B06ACA
dIg	171	172	0	62	141	#003E8D
dId	173	174	246	79	176	#F64FB0
A23d	175	176	123	123	132	#7B7B84
A24rv	177	178	106	158	106	#6A9E6A
A32p	179	180	106	202	88	#6ACA58
A23v	181	182	158	88	149	#9E5895
A24cd	183	184	62	9	79	#3E094F
A23c	185	186	149	62	237	#953EED
A32sg	187	188	97	79	44	#614F2C
cLinG	189	190	255	246	123	#FFF67B
rCunG	191	192	211	237	255	#D3EDFF
cCunG	193	194	106	9	141	#6A098D
rLinG	195	196	106	114	79	#6A724F
vmPOS	197	198	158	0	132	#9E0084
mOccG	199	200	202	0	202	#CA00CA
V5/MT+	201	202	35	44	0	#232C00
OPC	203	204	114	123	185	#727BB9
iOccG	205	206	211	202	255	#D3CAFF
msOccG	207	208	0	158	141	#009E8D
lsOccG	209	210	44	88	0	#2C5800

[truncated: 1 more sheets: Glasser]
